# Supplementary material
Source: Springer Nature journal article supplement (https://www.springermedizin.de/resource/supplementary/12887_2014_1161_MOESM12_ESM.pdf/9476678)

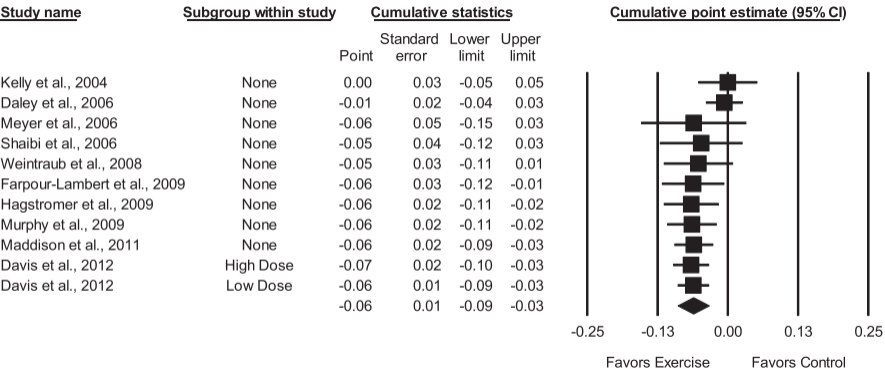

Supplement: MOESM12 [file 9476678]
